# Supplementary material for: Pathogenicity and Volatile Nematicidal Metabolites from Duddingtonia flagrans against Meloidogyne incognita
Source: MDPI journal article supplement (doi:10.3390/microorganisms9112268), 2021-10-31
Supplement: s1 [file s1]

## The GC-MS results of *Duddingtonia flagrans*

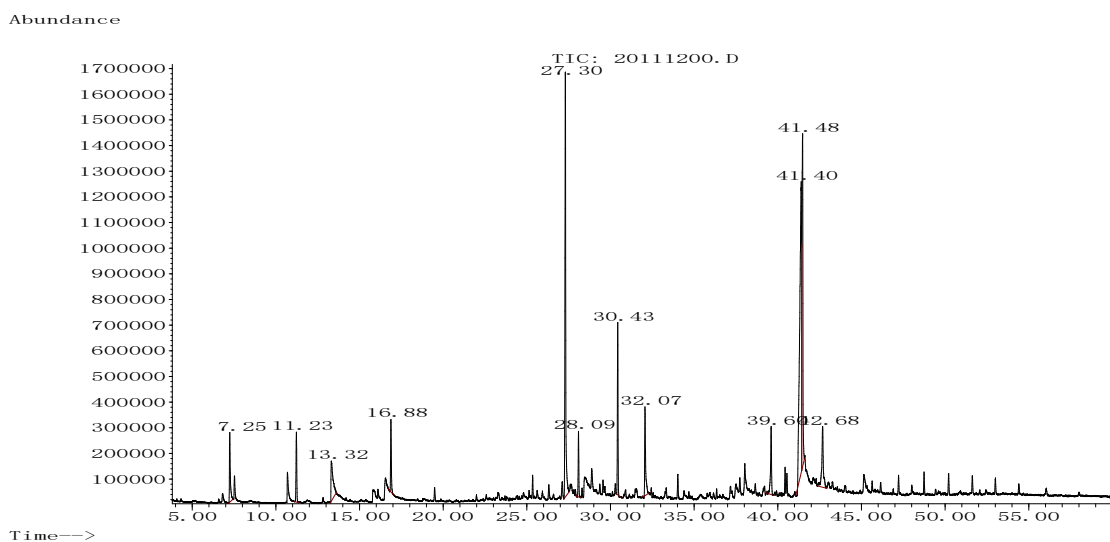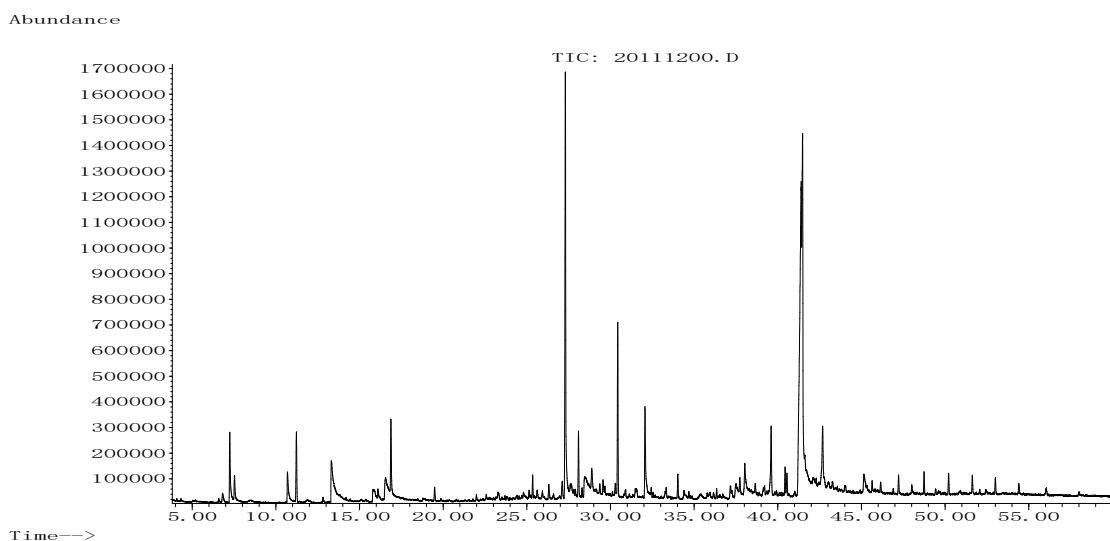

### Area Percent Report

Data File : C:\MSDCHEM\1\DATA\20111200.D

Acq On : 12 Nov 2020 16:38

Sample : MAF-GM

Misc :

Vial: 1

Operator:

Inst : GCMS

Multiplr: 1.00

Sample Amount: 0.00

MS Integration Params: autoint1.e

Method : C:\MSDCHEM\1\METHODS\D-DDVP.M (Chemstation Integrator)

Title :

Signal : TIC

| peak<br># | R.T. first<br>min | max last<br>scan scan | PK<br>scan TY | peak<br>height | corr.<br>area | corr.<br>% max. | % of<br>total |
|-----------|-------------------|-----------------------|---------------|----------------|---------------|-----------------|---------------|
| 1         | 7.245             | 880 892               | 936 PV        | 274578         | 11504382      | 11.88%          | 2.052%        |
| 2         | 7.528             | 936 945               | 1026 VB 5     | 103703         | 5360091       | 5.54%           | 0.956%        |
| 3         | 10.696            | 1488 1538             | 1619 PV 2     | 117921         | 7900252       | 8.16%           | 1.409%        |
| 4         | 11.230            | 1619 1638             | 1659 VV       | 275514         | 8845405       | 9.14%           | 1.578%        |
| 5         | 13.319            | 2020 2029             | 2119 VV 3     | 160928         | 20600532      | 21.28%          | 3.675%        |
| 6         | 13.827            | 2119 2124             | 2183 VV 3     | 26565          | 3457214       | 3.57%           | 0.617%        |
| 7         | 15.878            | 2504 2508             | 2541 VV 10    | 43051          | 3308607       | 3.42%           | 0.590%        |
| 8         | 16.102            | 2541 2550             | 2596 VV 6     | 45273          | 2796148       | 2.89%           | 0.499%        |
| 9         | 16.556            | 2612 2635             | 2682 PV 4     | 83282          | 10367834      | 10.71%          | 1.849%        |
| 10        | 16.877            | 2682 2695             | 2764 VV 2     | 305142         | 12667376      | 13.08%          | 2.260%        |
| 11        | 24.805            | 4169 4179             | 4224 VV 2     | 30535          | 2778061       | 2.87%           | 0.496%        |
| 12        | 25.350            | 4269 4281             | 4294 VV 3     | 96247          | 3042172       | 3.14%           | 0.543%        |
| 13        | 26.317            | 4437 4462             | 4494 PV 3     | 56923          | 2556214       | 2.64%           | 0.456%        |
| 14        | 27.118            | 4597 4612             | 4630 VV 8     | 69718          | 3060900       | 3.16%           | 0.546%        |
| 15        | 27.305            | 4630 4647             | 4691 VV 2     | 1661307        | 59122732      | 61.06%          | 10.547%       |
| 16        | 27.663            | 4707 4714             | 4735 VV 8     | 56372          | 3484371       | 3.60%           | 0.622%        |
| 17        | 28.090            | 4780 4794             | 4823 VV       | 255720         | 7742529       | 8.00%           | 1.381%        |
| 18        | 28.470            | 4849 4865             | 4901 VV 6     | 84219          | 10969189      | 11.33%          | 1.957%        |
| 19        | 28.683            | 4901 4905             | 4927 VV 6     | 57495          | 4056289       | 4.19%           | 0.724%        |
| 20        | 28.881            | 4927 4942             | 4971 VV 7     | 113740         | 8382606       | 8.66%           | 1.495%        |
| 21        | 29.362            | 5011 5032             | 5058 VV 4     | 54085          | 3599664       | 3.72%           | 0.642%        |
| 22        | 29.554            | 5058 5068             | 5081 VV 5     | 68082          | 2961899       | 3.06%           | 0.528%        |
| 23        | 30.291            | 5183 5206             | 5219 VV 9     | 51358          | 2527331       | 2.61%           | 0.451%        |
| 24        | 30.436            | 5219 5233             | 5260 VV       | 685237         | 18917805      | 19.54%          | 3.375%        |
| 25        | 32.065            | 5526 5538             | 5595 VV 3     | 351927         | 16858043      | 17.41%          | 3.007%        |
| 26        | 34.026            | 5890 5905             | 5956 VV 2     | 97625          | 3474236       | 3.59%           | 0.620%        |
| 27        | 34.400            | 5956 5975             | 6018 VV 9     | 34553          | 2950838       | 3.05%           | 0.526%        |
| 28        | 35.425            | 6134 6167             | 6207 VV 9     | 20720          | 2874163       | 2.97%           | 0.513%        |
| 29        | 37.178            | 6463 6495             | 6505 PV 6     | 51897          | 2649296       | 2.74%           | 0.473%        |
| 30        | 37.503            | 6533 6556             | 6583 VV 4     | 60439          | 5988987       | 6.19%           | 1.068%        |
| 31        | 37.728            | 6583 6598             | 6620 VV 9     | 83979          | 4921042       | 5.08%           | 0.878%        |
| 32        | 38.032            | 6637 6655             | 6698 VV 4     | 136392         | 11848258      | 12.24%          | 2.114%        |
| 33        | 38.657            | 6756 6772             | 6787 VV 8     | 59618          | 3435436       | 3.55%           | 0.613%        |
| 34        | 39.603            | 6911 6949             | 6978 VV 4     | 278898         | 14405728      | 14.88%          | 2.570%        |
| 35        | 40.436            | 7092 7105             | 7114 VV 5     | 119613         | 3725792       | 3.85%           | 0.665%        |
| 36        | 40.548            | 7114 7126             | 7139 VV 8     | 95699          | 3696097       | 3.82%           | 0.659%        |
| 37        | 41.398            | 7233 7285             | 7290 VV 8     | 1207526        | 96820174      | 100.00%         | 17.271%       |
| 38        | 41.478            | 7290 7300             | 7321 VV 7     | 1404363        | 67097490      | 69.30%          | 11.969%       |
| 39        | 41.617            | 7321 7326             | 7408 VV 7     | 163348         | 24569575      | 25.38%          | 4.383%        |
| 40        | 42.135            | 7408 7423             | 7445 VV 7     | 76958          | 7773995       | 8.03%           | 1.387%        |
| 41        | 42.295            | 7445 7453             | 7470 VV 10    | 72602          | 4491826       | 4.64%           | 0.801%        |
| 42        | 42.445            | 7470 7481             | 7496 VV 10    | 57210          | 4477079       | 4.62%           | 0.799%        |
| 43        | 42.680            | 7496 7525             | 7566 VV 4     | 273649         | 23004712      | 23.76%          | 4.104%        |
| 44        | 43.017            | 7566 7588             | 7609 VV 6     | 56829          | 6338107       | 6.55%           | 1.131%        |
| 45        | 43.273            | 7624 7636             | 7654 VV 6     | 56539          | 4085124       | 4.22%           | 0.729%        |

|    |        |      |      |      |       |       |         |       |        |
|----|--------|------|------|------|-------|-------|---------|-------|--------|
| 46 | 43.460 | 7654 | 7671 | 7682 | VV 6  | 34927 | 2739017 | 2.83% | 0.489% |
| 47 | 45.148 | 7958 | 7987 | 8016 | VV 10 | 81627 | 7842946 | 8.10% | 1.399% |
| 48 | 45.640 | 8068 | 8079 | 8099 | VV 6  | 56980 | 2785183 | 2.88% | 0.497% |
| 49 | 46.147 | 8163 | 8174 | 8213 | VV 5  | 50110 | 2899447 | 2.99% | 0.517% |
| 50 | 48.743 | 8643 | 8660 | 8680 | VV 2  | 89296 | 2725935 | 2.82% | 0.486% |
|    |        |      |      |      |       |       |         |       |        |
| 51 | 50.213 | 8923 | 8935 | 8956 | VV 4  | 84754 | 2741638 | 2.83% | 0.489% |
| 52 | 51.628 | 9164 | 9200 | 9222 | VV 3  | 76498 | 3349732 | 3.46% | 0.598% |

Sum of corrected areas: 560579501

Information from Data File:

File: C:\MSDCHEM\1\DATA\20111200.D  
 Operator:  
 Date Acquired: 12 Nov 2020 16:38  
 Method File: DLK  
 Sample Name: MAF-GM  
 Misc Info:  
 Vial Number: 1

Search Libraries: C:\Database\wiley7n.l Minimum Quality: 0

Unknown Spectrum: Apex minus start of peak  
 Integration Events: Chemstation Integrator - autoint1.e

| Pk#   | RT    | Area% | Library/ID                             | Ref#  | CAS#        | Qual |
|-------|-------|-------|----------------------------------------|-------|-------------|------|
| <hr/> |       |       |                                        |       |             |      |
| 1     | 7.24  | 2.05  | C:\Database\wiley7n.l                  |       |             |      |
|       |       |       | Cyclohexanol \$\$ Adronal \$\$ Adro... | 8465  | 000108-93-0 | 95   |
|       |       |       | Cyclohexanol (CAS) \$\$ Anol \$\$ N... | 8469  | 000108-93-0 | 95   |
|       |       |       | Cyclohexanol (CAS) \$\$ Anol \$\$ N... | 8473  | 000108-93-0 | 94   |
| <hr/> |       |       |                                        |       |             |      |
| 2     | 7.53  | 0.96  | C:\Database\wiley7n.l                  |       |             |      |
|       |       |       | Cyclohexanone \$\$ Anon \$\$ Anone ... | 7095  | 000108-94-1 | 90   |
|       |       |       | Cyclohexanone                          | 7094  | 000108-94-1 | 90   |
|       |       |       | Cyclohexanone                          | 7093  | 000108-94-1 | 90   |
| <hr/> |       |       |                                        |       |             |      |
| 3     | 10.70 | 1.41  | C:\Database\wiley7n.l                  |       |             |      |
|       |       |       | Cyclohexanamine, N,N-dimethyl- ...     | 23795 | 000098-94-2 | 91   |
|       |       |       | Cyclohexanamine, N,N-dimethyl-         | 23794 | 000098-94-2 | 83   |
|       |       |       | 3-Piperidinone, 1-ethyl- \$\$ 1-E...   | 23649 | 043152-93-8 | 78   |
| <hr/> |       |       |                                        |       |             |      |
| 4     | 11.23 | 1.58  | C:\Database\wiley7n.l                  |       |             |      |
|       |       |       | Heptane, 2,2,4,6,6-pentamethyl-        | 74449 | 013475-82-6 | 83   |
|       |       |       | Heptane, 2,2,4,6,6-pentamethyl-...     | 74451 | 013475-82-6 | 83   |
|       |       |       | Heptane, 2,2,4,6,6-pentamethyl-...     | 74452 | 013475-82-6 | 83   |
| <hr/> |       |       |                                        |       |             |      |
| 5     | 13.32 | 3.67  | C:\Database\wiley7n.l                  |       |             |      |
|       |       |       | 2-Pyrrolidinone, 1-methyl- (CAS...     | 7640  | 000872-50-4 | 90   |
|       |       |       | 2-Pyrrolidinone, 1-methyl- \$\$ M...   | 7643  | 000872-50-4 | 80   |
|       |       |       | 2-Pyrrolidinone, 1-methyl- (CAS...     | 7645  | 000872-50-4 | 78   |
| <hr/> |       |       |                                        |       |             |      |
| 6     | 13.83 | 0.62  | C:\Database\wiley7n.l                  |       |             |      |

|    |       |       |                                        |        |             |    |
|----|-------|-------|----------------------------------------|--------|-------------|----|
|    |       |       | Acetoxy-(3-aminopropyl)butylborane     | 93915  | 000000-00-0 | 43 |
|    |       |       | Cyclopropane carboxylic acid, 1...     | 8073   | 000000-00-0 | 38 |
|    |       |       | 4-Methyltetrahydropyran                | 8646   | 000000-00-0 | 30 |
| 7  | 15.88 | 0.59  | C:\Database\wiley7n.l                  |        |             |    |
|    |       |       | 3-azido-2-pyridone \$\$ 2(1H)-Pyr...   | 30629  | 022714-02-9 | 38 |
|    |       |       | ethyl 2-methylbuta-2,3-dienoate        | 22521  | 005717-41-9 | 38 |
|    |       |       | 4-azido-5-tert-butyl-2-cyano-2-...     | 161642 | 074987-59-0 | 28 |
| 8  | 16.10 | 0.50  | C:\Database\wiley7n.l                  |        |             |    |
|    |       |       | Nonanal                                | 38507  | 000124-19-6 | 80 |
|    |       |       | Nonanal (CAS) \$\$ n-Nonanal \$\$ n... | 38508  | 000124-19-6 | 64 |
|    |       |       | Dodecanal (CAS) \$\$ n-Dodecanal ...   | 93114  | 000112-54-9 | 35 |
| 9  | 16.56 | 1.85  | C:\Database\wiley7n.l                  |        |             |    |
|    |       |       | Benzeneethanol (CAS) \$\$ Pheneth...   | 19944  | 000060-12-8 | 91 |
|    |       |       | Phenylethyl Alcohol                    | 19948  | 000060-12-8 | 91 |
|    |       |       | Benzeneethanol (CAS) \$\$ Pheneth...   | 19951  | 000060-12-8 | 91 |
| 10 | 16.88 | 2.26  | C:\Database\wiley7n.l                  |        |             |    |
|    |       |       | Octanoic acid, methyl ester (CA...     | 57752  | 000111-11-5 | 94 |
|    |       |       | Octanoic acid, methyl ester (CA...     | 57750  | 000111-11-5 | 91 |
|    |       |       | Octanoic acid, methyl ester (CA...     | 57748  | 000111-11-5 | 91 |
| 11 | 24.80 | 0.50  | C:\Database\wiley7n.l                  |        |             |    |
|    |       |       | Benzaldehyde, 3-hydroxy-4-metho...     | 48685  | 000621-59-0 | 30 |
|    |       |       | Benzaldehyde, 4-hydroxy-3-metho...     | 48696  | 000121-33-5 | 30 |
|    |       |       | Vanillin                               | 48699  | 000121-33-5 | 27 |
| 12 | 25.35 | 0.54  | C:\Database\wiley7n.l                  |        |             |    |
|    |       |       | Tetradecane (CAS) \$\$ n-Tetradec...   | 113292 | 000629-59-4 | 97 |
|    |       |       | Tetradecane                            | 113289 | 000629-59-4 | 96 |
|    |       |       | Tetradecane \$\$ n-Tetradecane \$\$... | 113291 | 000629-59-4 | 95 |
| 13 | 26.32 | 0.46  | C:\Database\wiley7n.l                  |        |             |    |
|    |       |       | Butanoic acid, hexyl ester (CAS...     | 76417  | 002639-63-6 | 64 |
|    |       |       | Butanoic acid, hexyl ester (CAS...     | 76419  | 002639-63-6 | 56 |
|    |       |       | Propanoic acid, 2-methyl-, hexy...     | 76451  | 002349-07-7 | 53 |
| 14 | 27.12 | 0.55  | C:\Database\wiley7n.l                  |        |             |    |
|    |       |       | 2,5-Cyclohexadiene-1,4-dione, 2...     | 144342 | 000719-22-2 | 92 |
|    |       |       | 2,5-Cyclohexadiene-1,4-dione, 2...     | 144346 | 000719-22-2 | 91 |
|    |       |       | 2,5-Cyclohexadiene-1,4-dione, 2...     | 144343 | 000719-22-2 | 91 |
| 15 | 27.31 | 10.55 | C:\Database\wiley7n.l                  |        |             |    |
|    |       |       | 1-Dodecanol (CAS) \$\$ n-Dodecano...   | 95935  | 000112-53-8 | 95 |
|    |       |       | 1-Dodecanol                            | 95931  | 000112-53-8 | 95 |
|    |       |       | 1-Dodecanol (CAS) \$\$ n-Dodecano...   | 95929  | 000112-53-8 | 95 |
| 16 | 27.66 | 0.62  | C:\Database\wiley7n.l                  |        |             |    |
|    |       |       | Butanoic acid, propyl ester (CA...     | 26467  | 000105-66-8 | 72 |
|    |       |       | Butanoic acid, butyl ester (CAS...     | 40296  | 000109-21-7 | 56 |
|    |       |       | Butanoic acid, propyl ester (CA...     | 26460  | 000105-66-8 | 56 |
| 17 | 28.09 | 1.38  | C:\Database\wiley7n.l                  |        |             |    |
|    |       |       | Decane, 5,6-dipropyl-                  | 154957 | 119209-20-0 | 86 |

|    |       |      |                                        |                       |
|----|-------|------|----------------------------------------|-----------------------|
|    |       |      | bis(2-Ethylhexyl) ether                | 177063 000000-00-0 80 |
|    |       |      | Nonane, 2,3-dimethyl- \$\$ 2,3-Di...   | 56263 002884-06-2 64  |
| 18 | 28.47 | 1.96 | C:\Database\wiley7n.l                  |                       |
|    |       |      | Acetamide, N-(2-phenylethyl)- \$...    | 63352 000877-95-2 90  |
|    |       |      | PHENYLETHYLAMINE ACET. \$\$ P.E.A...   | 63410 000000-00-0 90  |
|    |       |      | Acetamide, N-(2-phenylethyl)-          | 63353 000877-95-2 83  |
| 19 | 28.68 | 0.72 | C:\Database\wiley7n.l                  |                       |
|    |       |      | 1-(phenylvinyl)-1-cyclopentene         | 74528 135312-78-6 35  |
|    |       |      | Pyrimidine, 4-methyl-2-phenyl- ...     | 74126 034771-48-7 27  |
|    |       |      | 1,1-Difluoro-2-methyl-2-vinyl-c...     | 17728 000000-00-0 10  |
| 20 | 28.88 | 1.50 | C:\Database\wiley7n.l                  |                       |
|    |       |      | 2,3-Dimethyl-1,4-dioxo-spiro[4....     | 112751 000000-00-0 53 |
|    |       |      | 4-METHOXY-6-PENTYL-5,6-DIHYDRO-...     | 112203 000000-00-0 49 |
|    |       |      | 3,5-Octanedione, 2,2,7-trimethyl-      | 92851 069725-37-7 47  |
| 21 | 29.36 | 0.64 | C:\Database\wiley7n.l                  |                       |
|    |       |      | 3-AMINO-5-DIMETHYLAMINO-1,2,4-T...     | 23414 051108-33-9 53  |
|    |       |      | 4-NITRO-1-METHYLPYRAZOLE \$\$ 4-N...   | 23345 003994-50-1 52  |
|    |       |      | 1-Methyl-3-nitropyrzazole              | 23337 054210-32-1 50  |
| 22 | 29.55 | 0.53 | C:\Database\wiley7n.l                  |                       |
|    |       |      | 1H-Imidazole, 4-methyl-5-nitro-        | 23382 014003-66-8 53  |
|    |       |      | 3-Butenoic acid, 2,2-diethyl-3-...     | 55271 038477-06-4 53  |
|    |       |      | 1H-Imidazole, 1-methyl-5-nitro-...     | 23371 003034-42-2 52  |
| 23 | 30.29 | 0.45 | C:\Database\wiley7n.l                  |                       |
|    |       |      | Hexadecane \$\$ n-Cetane \$\$ n-Hex... | 154910 000544-76-3 78 |
|    |       |      | Hexadecane (CAS) \$\$ n-Hexadecan...   | 154903 000544-76-3 60 |
|    |       |      | Hexadecane (CAS) \$\$ n-Hexadecan...   | 154916 000544-76-3 53 |
| 24 | 30.44 | 3.37 | C:\Database\wiley7n.l                  |                       |
|    |       |      | 2-Ethylhexyl 2-ethylhexanoate \$...    | 195503 007425-14-1 91 |
|    |       |      | 2-Ethylhexyl 2-ethylhexanoate \$...    | 195502 007425-14-1 90 |
|    |       |      | 2-Ethylhexyl 2-ethylhexanoate          | 195505 007425-14-1 52 |
| 25 | 32.07 | 3.01 | C:\Database\wiley7n.l                  |                       |
|    |       |      | Cyclododecane                          | 71563 000294-62-2 94  |
|    |       |      | Cyclododecane                          | 71568 000294-62-2 93  |
|    |       |      | Cyclododecane                          | 71566 000294-62-2 93  |
| 26 | 34.03 | 0.62 | C:\Database\wiley7n.l                  |                       |
|    |       |      | Silane, dimethyl-2-propenyl(tet...     | 263186 077774-33-5 64 |
|    |       |      | N-{8-[(2-Methoxycarbonyl-acetyl...     | 314840 000000-00-0 40 |
|    |       |      | 3-Acridinol, 9-phenyl-                 | 215035 109553-65-3 38 |
| 27 | 34.40 | 0.53 | C:\Database\wiley7n.l                  |                       |
|    |       |      | 1,3-DIPHENYL-1,3,5,5-TETRAMETHY...     | 294715 000000-00-0 59 |
|    |       |      | 1-Methyl-3,6-diazahomoadamantan...     | 190827 000000-00-0 38 |
|    |       |      | 1,3-Diphenyl-4H-1,2,4-triazolin...     | 191067 005055-73-2 35 |
| 28 | 35.43 | 0.51 | C:\Database\wiley7n.l                  |                       |
|    |       |      | 1,3-Dimethyl-melamine                  | 51410 000000-00-0 27  |
|    |       |      | Phenol, 3,5-dimethoxy-, acetate...     | 108701 023133-74-6 27 |

1,2,3-Trimethyl-5-(2-thia-n-hex... 177560 000000-00-0 22

29 37.18 0.47 C:\Database\wiley7n.l  
 vinylbital 150464 000000-00-0 35  
 N-METHYL-2-PROPYL-5-BUTYLPIPERI... 111130 000000-00-0 35  
 1,1'-Biphenyl (CAS) \$\$ Biphenyl... 53748 000092-52-4 30

30 37.50 1.07 C:\Database\wiley7n.l  
 p-(Methylthio)benzyl alcohol \$\$... 51750 003446-90-0 43  
 (+-)Boschnialactone \$\$ Cyclopen... 52265 016802-12-3 42  
 2,8-Diazaspiro(4,4)-nonane-1,9-... 51628 000000-00-0 37

31 37.73 0.88 C:\Database\wiley7n.l  
 Silane, (hexadecyloxy)trimethyl- 265324 006221-90-5 47  
 n-Tridecanoic acid, trimethylsi... 233386 000000-00-0 38  
 n-Pentadecanoic acid, trimethyl... 265153 000000-00-0 35

32 38.03 2.11 C:\Database\wiley7n.l  
 1,2-Benzenedicarboxylic acid, b... 223230 017851-53-5 38  
 1,2-Benzenedicarboxylic acid, m... 167331 024539-56-8 38  
 1,2-Benzenedicarboxylic acid, b... 254298 000084-64-0 38

33 38.66 0.61 C:\Database\wiley7n.l  
 Eicosane (CAS) \$\$ n-Eicosane 228990 000112-95-8 83  
 Eicosane \$\$ n-Eicosane 228983 000112-95-8 83  
 Eicosane (CAS) \$\$ n-Eicosane 228982 000112-95-8 70

34 39.60 2.57 C:\Database\wiley7n.l  
 Hexadecanoic acid, trimethylsil... 279149 055520-89-3 83  
 Hexadecanoic acid, trimethylsil... 279147 055520-89-3 38  
 Hexadecanoic acid, trimethylsil... 279148 055520-89-3 35

35 40.44 0.66 C:\Database\wiley7n.l  
 9,12-Octadecadienoic acid, meth... 243102 002566-97-4 99  
 10,13-Octadecadienoic acid, met... 243108 056554-62-2 97  
 9,12-Octadecadienoic acid, meth... 243170 002462-85-3 95

36 40.55 0.66 C:\Database\wiley7n.l  
 11-Octadecenoic acid, methyl ester 245515 052380-33-3 98  
 14-Octadecenoic acid, methyl ester 245519 056554-48-4 96  
 9-Octadecenoic acid (Z)-, methy... 245476 000112-62-9 95

37 41.40 17.27 C:\Database\wiley7n.l  
 9,12-Octadecadienoic acid (Z,Z)... 226103 000060-33-3 99  
 9,12-Octadecadienoic acid (Z,Z)... 226101 000060-33-3 97  
 9,12-Octadecadienoic acid (Z,Z)- 226099 000060-33-3 95

38 41.48 11.97 C:\Database\wiley7n.l  
 9-Octadecenoic acid, (E)- 228774 000112-79-8 94  
 HEPTADECENE-(8)-CARBONIC ACID-(1) 228686 000000-00-0 93  
 9-Octadecenoic acid (Z)- (CAS) ... 228694 000112-80-1 91

39 41.62 4.38 C:\Database\wiley7n.l  
 2-benzoyl-6,7-dimethoxy-4-methy... 277921 000000-00-0 86  
 2,4-Diphenyl-3-(methylthio)-5-n... 277863 072525-35-0 78  
 1-Dimethyl(chloromethyl)silylox... 317916 000000-00-0 72

|    |       |      |                                        |        |                |
|----|-------|------|----------------------------------------|--------|----------------|
| 40 | 42.14 | 1.39 | C:\Database\wiley7n.l                  |        |                |
|    |       |      | Hexadecanamide                         | 193941 | 000629-54-9 83 |
|    |       |      | 9-Octadecenamide, (Z)- (CAS) \$\$...   | 227140 | 000301-02-0 80 |
|    |       |      | Octadecanamide \$\$ Stearamide \$\$... | 229847 | 000124-26-5 80 |
| 41 | 42.30 | 0.80 | C:\Database\wiley7n.l                  |        |                |
|    |       |      | Octadecane, 2,6,10,14-tetrameth...     | 261320 | 054964-82-8 70 |
|    |       |      | Docosane (CAS) \$\$ n-Docosane \$\$... | 261309 | 000629-97-0 70 |
|    |       |      | (2S,3R)-3-dimethyl-t-butylsilox...     | 181197 | 097848-37-8 64 |
| 42 | 42.44 | 0.80 | C:\Database\wiley7n.l                  |        |                |
|    |       |      | t-Butyl (3S)-2-(5,6-di-O-acetyl...     | 357865 | 087436-58-6 17 |
|    |       |      | 2-Acetamido-8-hydroxy-10,10-dim...     | 243927 | 000000-00-0 10 |
|    |       |      | 9,10-Dihydro-9,10-([1',7']-tric...     | 244140 | 078365-74-9 9  |
| 43 | 42.68 | 4.10 | C:\Database\wiley7n.l                  |        |                |
|    |       |      | Oleic acid, trimethylsilyl ester       | 301854 | 021556-26-3 97 |
|    |       |      | 11-TRANS-OCTADECENOIC ACID 1TMS        | 301861 | 000000-00-0 96 |
|    |       |      | Oleic acid, trimethylsilyl este...     | 301853 | 000000-00-0 95 |
| 44 | 43.02 | 1.13 | C:\Database\wiley7n.l                  |        |                |
|    |       |      | 1-Naphthalenamine, N-phenyl-           | 143056 | 000090-30-2 76 |
|    |       |      | Nonox A \$\$ 1-Naphthalenamine, N...   | 143057 | 000090-30-2 60 |
|    |       |      | 2-Naphthalenamine, N-phenyl- (C...     | 143068 | 000135-88-6 59 |
| 45 | 43.27 | 0.73 | C:\Database\wiley7n.l                  |        |                |
|    |       |      | 1,1'-Biphenyl, 3-nitro- \$\$ Biph...   | 113852 | 002113-58-8 30 |
|    |       |      | 1,1'-Biphenyl, 3-nitro- \$\$ Biph...   | 113854 | 002113-58-8 30 |
|    |       |      | Acenaphthylene, 1,2-dihydro-5-n...     | 113869 | 000602-87-9 27 |
| 46 | 43.46 | 0.49 | C:\Database\wiley7n.l                  |        |                |
|    |       |      | Tributyl acetylcitrate                 | 333403 | 000077-90-7 43 |
|    |       |      | Tributyl acetylcitrate \$\$ 1,2,3...   | 333402 | 000077-90-7 37 |
|    |       |      | Ethanone, 1-(4-bromophenyl)-2,2...     | 188728 | 016184-89-7 30 |
| 47 | 45.15 | 1.40 | C:\Database\wiley7n.l                  |        |                |
|    |       |      | 9-Octadecenamide, (Z)- \$\$ Adoge...   | 227139 | 000301-02-0 86 |
|    |       |      | 9-Octadecenamide, (Z)-                 | 227138 | 000301-02-0 83 |
|    |       |      | Erucylamide \$\$ 13-Docosenamide,...   | 287552 | 000112-84-5 64 |
| 48 | 45.64 | 0.50 | C:\Database\wiley7n.l                  |        |                |
|    |       |      | Tetracosane                            | 288783 | 000646-31-1 91 |
|    |       |      | Tetracosane (CAS) \$\$ n-Tetracosane   | 288788 | 000646-31-1 91 |
|    |       |      | Octadecane                             | 193176 | 000593-45-3 89 |
| 49 | 46.15 | 0.52 | C:\Database\wiley7n.l                  |        |                |
|    |       |      | Methyl n-amyl disulfide \$\$ Disu...   | 45811  | 072437-68-4 40 |
|    |       |      | 1-Methoxyphospholane sulfide           | 45662  | 078870-70-9 37 |
|    |       |      | 3-Methyl-1,2-thiazolo[4,5-b]pyr...     | 45916  | 000000-00-0 25 |
| 50 | 48.74 | 0.49 | C:\Database\wiley7n.l                  |        |                |
|    |       |      | Tetracosane (CAS) \$\$ n-Tetracosane   | 288787 | 000646-31-1 97 |
|    |       |      | Tetracosane                            | 288783 | 000646-31-1 95 |
|    |       |      | Hexacosane                             | 311168 | 000630-01-3 94 |

51 50.21 0.49 C:\Database\wiley7n.l  
 Heptacosane 320678 000593-49-7 94  
 Heptacosane \$\$ n-Heptacosane 320679 000593-49-7 93  
 9-methylnonadecane 229008 000000-00-0 93

52 51.63 0.60 C:\Database\wiley7n.l  
 Octacosane (CAS) \$\$ n-Octacosane 329269 000630-02-4 98  
 Octadecane (CAS) \$\$ n-Octadecan... 193184 000593-45-3 89  
 Docosane 261314 000629-97-0 89

Tue Feb 02 19:05:52 2021

**The mortality of *M. incognita* treated with other eight metabolites (10 µL).**

|                     | Mortality of <i>M. incognita</i> % |        |        |
|---------------------|------------------------------------|--------|--------|
|                     | 6 h                                | 12 h   | 24 h   |
| Heptane             | 1.27 %                             | 1.80 % | 3.76 % |
| 2-Pyrrolidinone     | 1.10 %                             | 1.54 % | 1.80 % |
| Benzeneethanol      | 1.04 %                             | 1.55 % | 2.48 % |
| Tetradecane         | 1.57 %                             | 2.06 % | 3.50 % |
| 1-Dodecanol         | 1.22 %                             | 1.53 % | 2.40 % |
| Cyclododecane       | 0.86 %                             | 1.47 % | 2.23 % |
| 9-Octadecenoic acid | 1.12 %                             | 1.45 % | 2.70 % |
| Tetracosane         | 1.29 %                             | 1.44 % | 4.03 % |
| control             | 1.55 %                             | 2.12 % | 2.90 % |
